# Supplementary material for: Health issues in a Bangalore slum: findings from a household survey using a mobile screening toolkit in Devarajeevanahalli
Source: Springer Nature journal article supplement (doi:10.1186/s12889-019-6756-7), 2019-04-29

# Design for Kit A and Kit B of THULSI

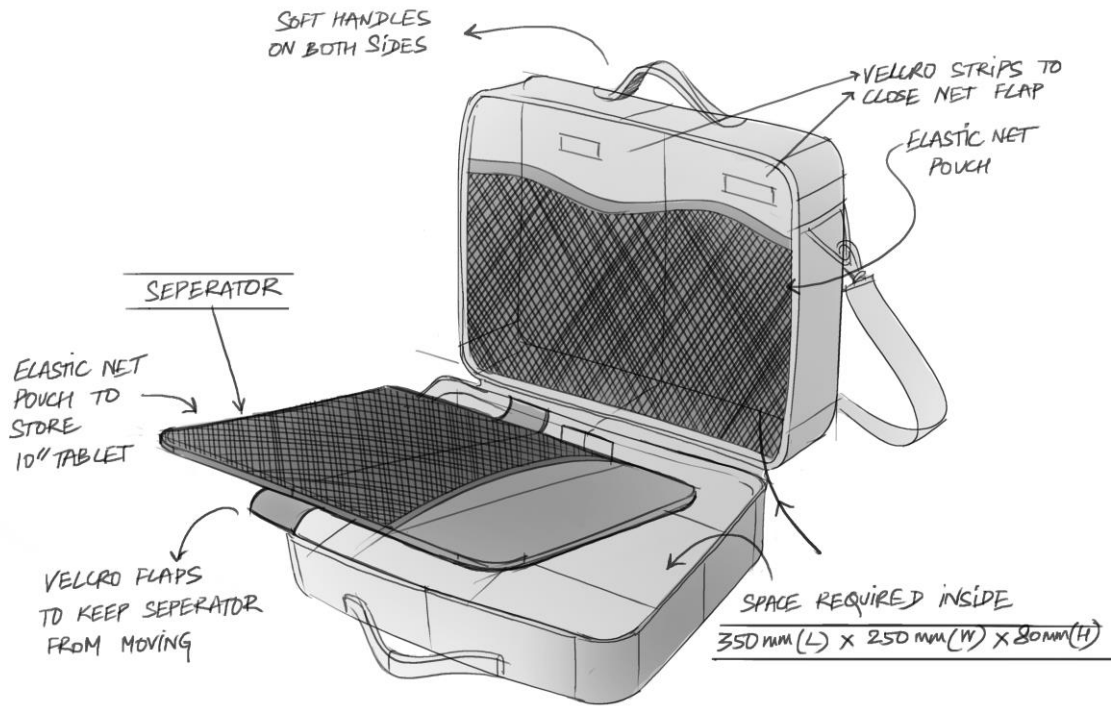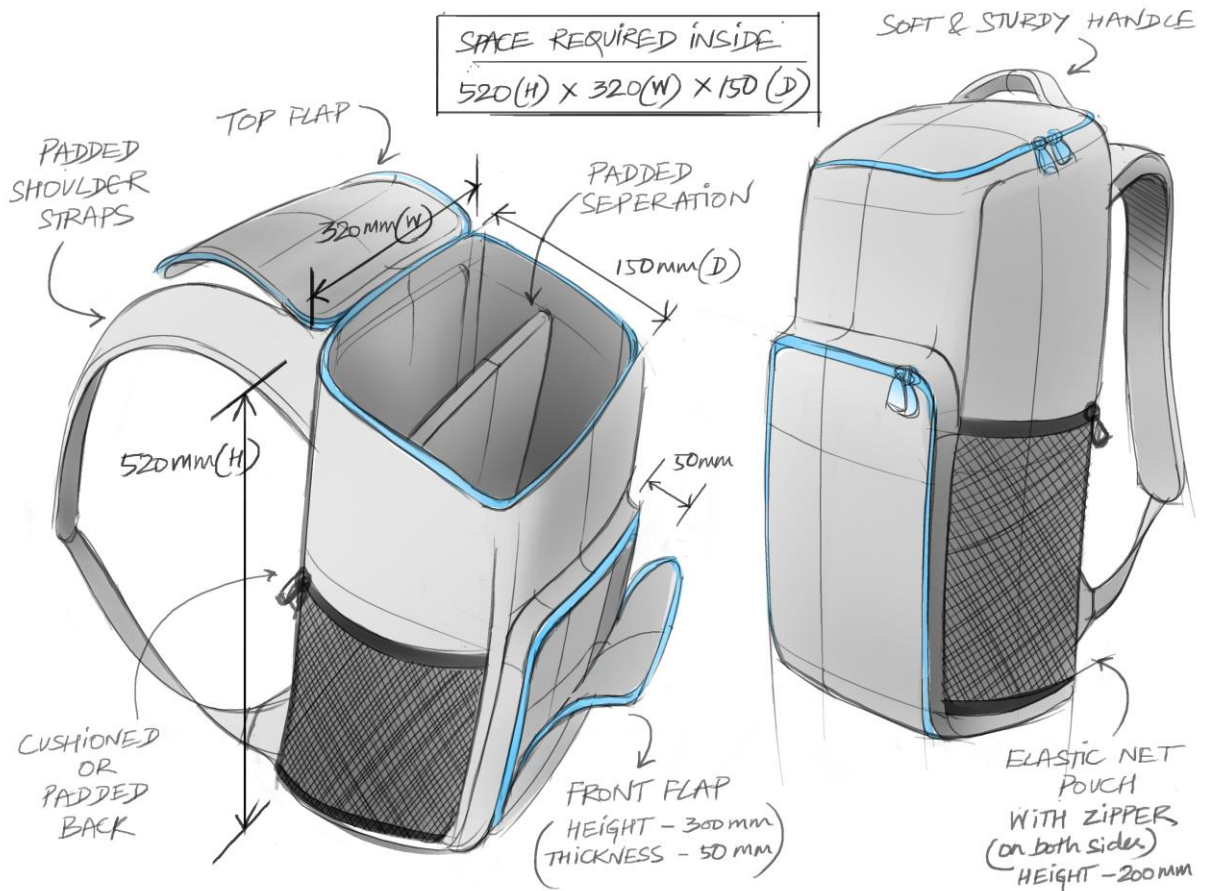

Supplement: MOESM1 [file 16685124]
